# Supplementary material for: Beauveria bassiana Water Extracts’ Effect on the Growth of Wheat
Source: MDPI journal article supplement (doi:10.3390/plants12020326), 2023-01-10
Supplement: s1 [file s1]

# *Beauveria bassiana* Water Extracts' effect on the Growth of Wheat

Dawid J. Kramski <sup>1,2,5</sup>, Daria Nowinski <sup>3,5</sup>, Kaja Kowalczyk <sup>5</sup>, Piotr Kruszyński <sup>5</sup>, Jagoda Radzimska <sup>5</sup> and Beata Greb-Markiewicz <sup>4,\*</sup>

<sup>1</sup> Department of Advanced Material Technology, Faculty of Chemistry, Wrocław University of Science and Technology, Wybrzeże Wyspiańskiego 27, 50-370 Wrocław, Poland; dawid.kramski@pwr.edu.pl

<sup>2</sup> Department of Analytical Chemistry and Chemical Metallurgy, Faculty of Chemistry, Wrocław University of Science and Technology, Wybrzeże Wyspiańskiego 27, 50-370 Wrocław, Poland

<sup>3</sup> Department of Organic and Organic and Medicinal Chemistry, Faculty of Chemistry, Wrocław University of Science and Technology, Wybrzeże Wyspiańskiego 27, 50-370 Wrocław, Poland; daria.koczek@pwr.edu.pl

<sup>4</sup> Department of Biochemistry, Molecular Biology and Biotechnology, Faculty of Chemistry, Wrocław University of Science and Technology, Wybrzeże Wyspiańskiego 27, 50-370 Wrocław, Poland

<sup>5</sup> Students Science Association Bio-Top, Faculty of Chemistry, Wrocław University of Science and Technology, Wybrzeże Wyspiańskiego 27, 50-370 Wrocław, Poland; 252353@student.pwr.edu.pl (K.K.); 252359@student.pwr.edu.pl (P.K.); 258605@student.pwr.edu.pl (J.R.)

\* Correspondence: beata.greb-markiewicz@pwr.edu.pl

## Supplementary Information for Statistical Analysis:

**Table S1.** Results of the length measuring with means, standard deviation, standard deviation error, median and quartiles (Q25 and Q75). Shapiro-Wilk test if p-value > 0.05 there is a normal distribution. p-values for the Shapiro-Wilk test are shown in the **Table S2**. Since the distribution is other than normal for one group, the Kruskal-Wallis test was used in the next step. The p-values for the Kruskal-Wallis test are shown in the **Table S3**.

**Table S4.** Results for the fresh weight measurement with means, standard deviation, standard deviation error, median and quartiles (Q25 and Q75). Shapiro-Wilk test if p-value > 0.05 there is a normal distribution. p-values for the Shapiro-Wilk test are shown in the **Table S5**. Since the distribution is other than normal for one group, the Kruskal-Wallis test was used in the next step. The p-values for the Kruskal-Wallis test are shown in the **Table S6**.

**Table S1.** The results of tested plants length measurement. In the Table means, standard deviation, standard deviation error, median and quartiles (Q25 and Q75) are presented.

| Group   | Means | Std.Dev. | Std.Err. | Q25   | Median | Q75   |
|---------|-------|----------|----------|-------|--------|-------|
| E3/0.5  | 9,57  | 1,62     | 0,29     | 8,05  | 9,75   | 10,85 |
| E3/2.5  | 9,99  | 1,78     | 0,30     | 8,20  | 10,10  | 11,40 |
| E3/10   | 11,33 | 2,32     | 0,40     | 9,60  | 11,50  | 13,00 |
| EB3/0.5 | 7,46  | 0,80     | 0,16     | 6,80  | 7,40   | 8,00  |
| EB3/2.5 | 7,94  | 0,98     | 0,20     | 7,20  | 8,00   | 8,60  |
| EB3/10  | 7,39  | 1,10     | 0,22     | 6,40  | 7,30   | 8,00  |
| E7/0,5  | 11,27 | 1,80     | 0,30     | 10,00 | 11,10  | 12,60 |
| E7/2,5  | 10,80 | 1,44     | 0,23     | 10,00 | 10,70  | 12,00 |
| E7/10   | 10,24 | 2,00     | 0,32     | 7,90  | 11,05  | 11,70 |
| EB7/0.5 | 9,95  | 1,62     | 0,27     | 8,60  | 10,00  | 11,30 |

|          |       |      |      |       |       |       |
|----------|-------|------|------|-------|-------|-------|
| EB7/2.5  | 10,42 | 1,58 | 0,27 | 8,80  | 10,80 | 11,60 |
| EB7/10   | 10,42 | 1,25 | 0,21 | 9,50  | 10,60 | 11,40 |
| E10/0.5  | 11,66 | 1,80 | 0,30 | 10,20 | 11,70 | 13,00 |
| E10/2.5  | 11,47 | 1,21 | 0,20 | 10,50 | 11,55 | 12,40 |
| E10/10   | 11,99 | 2,03 | 0,33 | 9,70  | 12,20 | 13,70 |
| EB10/0.5 | 7,52  | 1,39 | 0,27 | 6,10  | 7,30  | 8,80  |
| EB10/2.5 | 8,90  | 1,11 | 0,22 | 8,00  | 9,05  | 9,90  |
| EB10/10  | 5,45  | 0,93 | 0,19 | 4,90  | 5,55  | 5,95  |
| C        | 7,92  | 1,59 | 0,24 | 6,90  | 8,10  | 9,10  |

**Table S2.** The Shapiro-Wilk test p-values for tested plants length measurement.

| group    | p-value |
|----------|---------|
| E3/0.5   | 0.0831  |
| E3/2.5   | 0.0861  |
| E3/10    | 0.5198  |
| E7/0.5   | 0,5713  |
| E7/2.5   | 0,5715  |
| E7/10    | 0,0006  |
| E10/0.5  | 0,0358  |
| E10/2.5  | 0,7064  |
| E10/10   | 0,0267  |
| EB3/0.5  | 0,5396  |
| EB3/2.5  | 0,8751  |
| EB3/10   | 0,1020  |
| EB7/0.5  | 0,0878  |
| EB7/2.5  | 0,0314  |
| EB7/10   | 0,3903  |
| EB10/0.5 | 0,0997  |
| EB10/2.5 | 0,1193  |
| EB10/10  | 0,9751  |
| Control  | 0,3429  |

**Table S3.** The Kruskal-Wallis test p-values for tested plants length measurement.

|          | E3/0.5   | E3/2.5   | E3/10    | EB3/0.5  | EB3/2.5  | EB3/10   | E7/0.5   | E7/2.5   | E7/10    | EB7/0.5  | EB7/2.5  | EB7/10   | E10/0.5  | E10/2.5  | E10/10   | EB10/0.5 | EB10/2.5 | EB10/10  | C        |
|----------|----------|----------|----------|----------|----------|----------|----------|----------|----------|----------|----------|----------|----------|----------|----------|----------|----------|----------|----------|
| E3/0.5   |          | 1,000000 | 0,590318 | 0,033077 | 0,610244 | 0,033739 | 0,417228 | 1,000000 | 1,000000 | 1,000000 | 1,000000 | 1,000000 | 0,022589 | 0,029654 | 0,006664 | 0,098323 | 1,000000 | 0,000005 | 0,405781 |
| E3/2.5   | 1,000000 |          | 1,000000 | 0,001007 | 0,036694 | 0,001031 | 1,000000 | 1,000000 | 1,000000 | 1,000000 | 1,000000 | 1,000000 | 0,319432 | 0,420247 | 0,115332 | 0,003497 | 1,000000 | 0,000000 | 0,012962 |
| E3/10    | 0,590318 | 1,000000 |          | 0,000000 | 0,000002 | 0,000000 | 1,000000 | 1,000000 | 1,000000 | 1,000000 | 1,000000 | 1,000000 | 1,000000 | 1,000000 | 1,000000 | 0,000000 | 0,009648 | 0,000000 | 0,000000 |
| EB3/0.5  | 0,033077 | 0,001007 | 0,000000 |          | 1,000000 | 1,000000 | 0,000000 | 0,000000 | 0,000049 | 0,001244 | 0,000017 | 0,000015 | 0,000000 | 0,000000 | 0,000000 | 1,000000 | 1,000000 | 1,000000 | 1,000000 |
| EB3/2.5  | 0,610244 | 0,036694 | 0,000002 | 1,000000 |          | 1,000000 | 0,000001 | 0,000020 | 0,003056 | 0,043761 | 0,001169 | 0,001040 | 0,000000 | 0,000000 | 0,000000 | 1,000000 | 1,000000 | 1,000000 | 1,000000 |
| EB3/10   | 0,033739 | 0,001031 | 0,000000 | 1,000000 | 1,000000 |          | 0,000000 | 0,000000 | 0,000050 | 0,001274 | 0,000018 | 0,000015 | 0,000000 | 0,000000 | 0,000000 | 1,000000 | 1,000000 | 1,000000 | 1,000000 |
| E7/0.5   | 0,417228 | 1,000000 | 1,000000 | 0,000000 | 0,000001 | 0,000000 |          | 1,000000 | 1,000000 | 1,000000 | 1,000000 | 1,000000 | 1,000000 | 1,000000 | 1,000000 | 0,000000 | 0,005669 | 0,000000 | 0,000000 |
| E7/2.5   | 1,000000 | 1,000000 | 1,000000 | 0,000000 | 0,000020 | 0,000000 | 1,000000 |          | 1,000000 | 1,000000 | 1,000000 | 1,000000 | 1,000000 | 1,000000 | 1,000000 | 0,000001 | 0,053403 | 0,000000 | 0,000001 |
| E7/10    | 1,000000 | 1,000000 | 1,000000 | 0,000049 | 0,003056 | 0,000050 | 1,000000 | 1,000000 |          | 1,000000 | 1,000000 | 1,000000 | 1,000000 | 1,000000 | 0,671352 | 0,000187 | 1,000000 | 0,000000 | 0,000554 |
| EB7/0.5  | 1,000000 | 1,000000 | 1,000000 | 0,001244 | 0,043761 | 0,001274 | 1,000000 | 1,000000 | 1,000000 |          | 1,000000 | 1,000000 | 0,270091 | 0,355476 | 0,095983 | 0,004291 | 1,000000 | 0,000000 | 0,016071 |
| EB7/2.5  | 1,000000 | 1,000000 | 1,000000 | 0,000017 | 0,001169 | 0,000018 | 1,000000 | 1,000000 | 1,000000 | 1,000000 |          | 1,000000 | 1,000000 | 1,000000 | 1,000000 | 0,000068 | 0,789296 | 0,000000 | 0,000194 |
| EB7/10   | 1,000000 | 1,000000 | 1,000000 | 0,000015 | 0,001040 | 0,000015 | 1,000000 | 1,000000 | 1,000000 | 1,000000 | 1,000000 |          | 1,000000 | 1,000000 | 1,000000 | 0,000058 | 0,752911 | 0,000000 | 0,000161 |
| E10/0.5  | 0,022589 | 0,319432 | 1,000000 | 0,000000 | 0,000000 | 0,000000 | 1,000000 | 1,000000 | 1,000000 | 0,270091 | 1,000000 | 1,000000 |          | 1,000000 | 1,000000 | 0,000000 | 0,000174 | 0,000000 | 0,000000 |
| E10/2.5  | 0,029654 | 0,420247 | 1,000000 | 0,000000 | 0,000000 | 0,000000 | 1,000000 | 1,000000 | 1,000000 | 0,355476 | 1,000000 | 1,000000 | 1,000000 |          | 1,000000 | 0,000000 | 0,000224 | 0,000000 | 0,000000 |
| E10/10   | 0,006664 | 0,115332 | 1,000000 | 0,000000 | 0,000000 | 0,000000 | 1,000000 | 1,000000 | 0,671352 | 0,095983 | 1,000000 | 1,000000 | 1,000000 | 1,000000 |          | 0,000000 | 0,000040 | 0,000000 | 0,000000 |
| EB10/0.5 | 0,098323 | 0,003497 | 0,000000 | 1,000000 | 1,000000 | 1,000000 | 0,000000 | 0,000001 | 0,000187 | 0,004291 | 0,000068 | 0,000058 | 0,000000 | 0,000000 | 0,000000 |          | 1,000000 | 1,000000 | 1,000000 |
| EB10/2.5 | 1,000000 | 1,000000 | 0,009648 | 1,000000 | 1,000000 | 1,000000 | 0,005669 | 0,053403 | 1,000000 | 1,000000 | 0,789296 | 0,752911 | 0,000174 | 0,000224 | 0,000040 | 1,000000 |          | 0,006267 | 1,000000 |
| EB10/10  | 0,000005 | 0,000000 | 0,000000 | 1,000000 | 1,000000 | 1,000000 | 0,000000 | 0,000000 | 0,000000 | 0,000000 | 0,000000 | 0,000000 | 0,000000 | 0,000000 | 0,000000 | 1,000000 | 0,006267 |          | 0,332807 |
| Control  | 0,405781 | 0,012962 | 0,000000 | 1,000000 | 1,000000 | 1,000000 | 0,000000 | 0,000001 | 0,000554 | 0,016071 | 0,000194 | 0,000161 | 0,000000 | 0,000000 | 0,000000 | 1,000000 | 1,000000 | 0,332807 |          |

**Table S4.** The results of tested plants fresh weight measurement. In the Table means, standard deviation, standard deviation error, median and quartiles (Q25 and Q75) are presented.

| Group    | Means    | Std.Dev. | Std.Err. | Q25      | Median   | Q75      |
|----------|----------|----------|----------|----------|----------|----------|
| E3/0.5   | 0,034772 | 0,015529 | 0,002745 | 0,022150 | 0,032850 | 0,044300 |
| E3/2.5   | 0,037077 | 0,013533 | 0,002287 | 0,024700 | 0,039500 | 0,048700 |
| E3/10    | 0,054212 | 0,020834 | 0,003627 | 0,042700 | 0,051200 | 0,063400 |
| EB3/0.5  | 0,007772 | 0,001155 | 0,000231 | 0,006800 | 0,007800 | 0,008300 |
| EB3/2.5  | 0,007020 | 0,001483 | 0,000297 | 0,005800 | 0,007300 | 0,008000 |
| EB3/10   | 0,007228 | 0,001463 | 0,000293 | 0,006300 | 0,006700 | 0,008600 |
| E7/0,5   | 0,035195 | 0,021481 | 0,003531 | 0,016100 | 0,027400 | 0,056800 |
| E7/2,5   | 0,037187 | 0,012144 | 0,001970 | 0,026000 | 0,038750 | 0,046500 |
| E7/10    | 0,034871 | 0,012556 | 0,002037 | 0,025300 | 0,039200 | 0,044400 |
| EB7/0.5  | 0,035303 | 0,011919 | 0,002015 | 0,025500 | 0,033100 | 0,044800 |
| EB7/2.5  | 0,035929 | 0,013582 | 0,002329 | 0,027800 | 0,036700 | 0,042500 |
| EB7/10   | 0,034183 | 0,012472 | 0,002108 | 0,029200 | 0,033800 | 0,043200 |
| E10/0.5  | 0,049957 | 0,013441 | 0,002272 | 0,039200 | 0,049300 | 0,061200 |
| E10/2.5  | 0,045984 | 0,009922 | 0,001610 | 0,039600 | 0,044100 | 0,054200 |
| E10/10   | 0,047000 | 0,017850 | 0,002935 | 0,031600 | 0,048600 | 0,062300 |
| EB10/0.5 | 0,006719 | 0,001670 | 0,000321 | 0,005400 | 0,006600 | 0,007800 |
| EB10/2.5 | 0,008273 | 0,002122 | 0,000416 | 0,006500 | 0,008600 | 0,009600 |
| EB10/10  | 0,006217 | 0,001508 | 0,000308 | 0,005050 | 0,006250 | 0,007350 |
| Control  | 0,022295 | 0,015690 | 0,002393 | 0,010400 | 0,015800 | 0,033500 |

**Table S5.** The Shapiro-Wilk test p-values for plants fresh weight measurement.

| group    | p-value |
|----------|---------|
| E3/0.5   | 0.0877  |
| E3/2.5   | 0.0684  |
| E3/10    | 0.0026  |
| E7/0.5   | 0.0002  |
| E7/2.5   | 0.0385  |
| E7/10    | 0.0111  |
| E10/0.5  | 0.3214  |
| E10/2.5  | 0.0411  |
| E10/10   | 0.0219  |
| EB3/0.5  | 0.7548  |
| EB3/2.5  | 0.9276  |
| EB3/10   | 0.0295  |
| EB7/0.5  | 0.3256  |
| EB7/2.5  | 0.7844  |
| EB7/10   | 0.367   |
| EB10/0.5 | 0.8749  |
| EB10/2.5 | 0.4286  |
| EB10/10  | 0.5007  |
| Control  | 0.2341  |

**Table S6.** The Kruskal-Wallis test p-values for plants fresh weight measurement.

|          | E3/0.5   | E3/2.5   | E3/10    | EB3/0.5  | EB3/2.5  | EB3/10   | E7/0,5   | E7/2,5   | E7/10    | EB7/0.5  | EB7/2.5  | EB7/10   | E10/0.5  | E10/2.5  | E10/10   | EB10/0.5 | EB10/2.5 | EB10/10  | C        |
|----------|----------|----------|----------|----------|----------|----------|----------|----------|----------|----------|----------|----------|----------|----------|----------|----------|----------|----------|----------|
| E3/0.5   |          | 1,000000 | 0,315225 | 0,000014 | 0,000001 | 0,000002 | 1,000000 | 1,000000 | 1,000000 | 1,000000 | 1,000000 | 1,000000 | 0,568464 | 1,000000 | 1,000000 | 0,000000 | 0,000030 | 0,000000 | 1,000000 |
| E3/2.5   | 1,000000 |          | 1,000000 | 0,000000 | 0,000000 | 0,000000 | 1,000000 | 1,000000 | 1,000000 | 1,000000 | 1,000000 | 1,000000 | 1,000000 | 1,000000 | 1,000000 | 0,000000 | 0,000001 | 0,000000 | 0,197576 |
| E3/10    | 0,315225 | 1,000000 |          | 0,000000 | 0,000000 | 0,000000 | 0,218433 | 1,000000 | 0,318661 | 0,404678 | 0,552419 | 0,179544 | 1,000000 | 1,000000 | 1,000000 | 0,000000 | 0,000000 | 0,000000 | 0,000001 |
| EB3/0.5  | 0,000014 | 0,000000 | 0,000000 |          | 1,000000 | 1,000000 | 0,000005 | 0,000000 | 0,000002 | 0,000004 | 0,000003 | 0,000013 | 0,000000 | 0,000000 | 0,000000 | 1,000000 | 1,000000 | 1,000000 | 0,161622 |
| EB3/2.5  | 0,000001 | 0,000000 | 0,000000 | 1,000000 |          | 1,000000 | 0,000000 | 0,000000 | 0,000000 | 0,000000 | 0,000000 | 0,000001 | 0,000000 | 0,000000 | 0,000000 | 1,000000 | 1,000000 | 1,000000 | 0,023388 |
| EB3/10   | 0,000002 | 0,000000 | 0,000000 | 1,000000 | 1,000000 |          | 0,000001 | 0,000000 | 0,000000 | 0,000000 | 0,000000 | 0,000001 | 0,000000 | 0,000000 | 0,000000 | 1,000000 | 1,000000 | 1,000000 | 0,034111 |
| E7/0,5   | 1,000000 | 1,000000 | 0,218433 | 0,000005 | 0,000000 | 0,000001 |          | 1,000000 | 1,000000 | 1,000000 | 1,000000 | 1,000000 | 0,405369 | 1,000000 | 1,000000 | 0,000000 | 0,000012 | 0,000000 | 1,000000 |
| E7/2,5   | 1,000000 | 1,000000 | 1,000000 | 0,000000 | 0,000000 | 0,000000 | 1,000000 |          | 1,000000 | 1,000000 | 1,000000 | 1,000000 | 1,000000 | 1,000000 | 1,000000 | 0,000000 | 0,000000 | 0,000000 | 0,151250 |
| E7/10    | 1,000000 | 1,000000 | 0,318661 | 0,000002 | 0,000000 | 0,000000 | 1,000000 | 1,000000 |          | 1,000000 | 1,000000 | 1,000000 | 0,585306 | 1,000000 | 1,000000 | 0,000000 | 0,000005 | 0,000000 | 0,779873 |
| EB7/0.5  | 1,000000 | 1,000000 | 0,404678 | 0,000004 | 0,000000 | 0,000000 | 1,000000 | 1,000000 | 1,000000 |          | 1,000000 | 1,000000 | 0,730454 | 1,000000 | 1,000000 | 0,000000 | 0,000008 | 0,000000 | 0,912713 |
| EB7/2.5  | 1,000000 | 1,000000 | 0,552419 | 0,000003 | 0,000000 | 0,000000 | 1,000000 | 1,000000 | 1,000000 | 1,000000 |          | 1,000000 | 0,982465 | 1,000000 | 1,000000 | 0,000000 | 0,000007 | 0,000000 | 0,766838 |
| EB7/10   | 1,000000 | 1,000000 | 0,179544 | 0,000013 | 0,000001 | 0,000001 | 1,000000 | 1,000000 | 1,000000 | 1,000000 | 1,000000 |          | 0,333372 | 1,000000 | 1,000000 | 0,000000 | 0,000027 | 0,000000 | 1,000000 |
| E10/0.5  | 0,568464 | 1,000000 | 1,000000 | 0,000000 | 0,000000 | 0,000000 | 0,405369 | 1,000000 | 0,585306 | 0,730454 | 0,982465 | 0,333372 |          | 1,000000 | 1,000000 | 0,000000 | 0,000000 | 0,000000 | 0,000001 |
| E10/2.5  | 1,000000 | 1,000000 | 1,000000 | 0,000000 | 0,000000 | 0,000000 | 1,000000 | 1,000000 | 1,000000 | 1,000000 | 1,000000 | 1,000000 | 1,000000 |          | 1,000000 | 0,000000 | 0,000000 | 0,000000 | 0,000045 |
| E10/10   | 1,000000 | 1,000000 | 1,000000 | 0,000000 | 0,000000 | 0,000000 | 1,000000 | 1,000000 | 1,000000 | 1,000000 | 1,000000 | 1,000000 | 1,000000 | 1,000000 |          | 0,000000 | 0,000000 | 0,000000 | 0,000111 |
| EB10/0.5 | 0,000000 | 0,000000 | 0,000000 | 1,000000 | 1,000000 | 1,000000 | 0,000000 | 0,000000 | 0,000000 | 0,000000 | 0,000000 | 0,000000 | 0,000000 | 0,000000 | 0,000000 |          | 1,000000 | 1,000000 | 0,007120 |
| EB10/2.5 | 0,000030 | 0,000001 | 0,000000 | 1,000000 | 1,000000 | 1,000000 | 0,000012 | 0,000000 | 0,000005 | 0,000008 | 0,000007 | 0,000027 | 0,000000 | 0,000000 | 0,000000 | 1,000000 |          | 1,000000 | 0,289311 |
| EB10/10  | 0,000000 | 0,000000 | 0,000000 | 1,000000 | 1,000000 | 1,000000 | 0,000000 | 0,000000 | 0,000000 | 0,000000 | 0,000000 | 0,000000 | 0,000000 | 0,000000 | 0,000000 | 1,000000 | 1,000000 |          | 0,004001 |
| C        | 1,000000 | 0,197576 | 0,000001 | 0,161622 | 0,023388 | 0,034111 | 1,000000 | 0,151250 | 0,779873 | 0,912713 | 0,766838 | 1,000000 | 0,000001 | 0,000045 | 0,000111 | 0,007120 | 0,289311 | 0,004001 |          |
